# Supplementary material
Source: PubMed Central journal article supplement (PMC6353646)
Supplement: 10-1055-s-0038-1677009-s180171ra.pdf [file 10-1055-s-0038-1677009-s180171ra.pdf]

## Supplementary Appendix A: Selection of Predictors for Multilevel Model

| Model Evaluated                                                                                                                                                                                                                                                   | Fixed effect removed              | -2 Log Likelihood | Number of Parameters | Likelihood ratio test      | Include in final model |
|-------------------------------------------------------------------------------------------------------------------------------------------------------------------------------------------------------------------------------------------------------------------|-----------------------------------|-------------------|----------------------|----------------------------|------------------------|
| Fixed intercept, Random intercept (participant), Complexity, CDS, Omission error, Commission error, Complexity * CDS, Complexity * Omission error, Complexity * Commission error, CDS * Omission error, CDS * Commission error, Omission error * Commission error |                                   | 2969.117          | 17                   |                            |                        |
| Fixed intercept, Random intercept (participant), Complexity, CDS, Omission error, Commission error, Complexity * CDS, Complexity * Omission error, CDS * Omission error, Omission error * Commission error                                                        | Complexity * Commission error     | 2969.118          | 16                   | $\chi^2(1)=.001$ p=.975    | Exclude                |
| Fixed intercept, Random intercept (participant), Complexity, CDS, Omission error, Commission error, Complexity * CDS, Complexity * Omission error, CDS * Commission error, Omission error * Commission error                                                      | CDS * Omission error              | 2969.282          | 14                   | $\chi^2(2)=.164$ p=.921    | Exclude                |
| Fixed intercept, Random intercept (participant), Complexity, CDS, Omission error, Commission error, Complexity * Omission error, CDS * Commission error, Omission error * Commission error                                                                        | Complexity * CDS                  | 2969.829          | 12                   | $\chi^2(2)=.547$ p=.761    | Exclude                |
| Fixed intercept, Random intercept (participant), Complexity, CDS, Omission error, Commission error, CDS * Commission error, Omission error * Commission error                                                                                                     | Complexity * Omission error       | 2969.847          | 11                   | $\chi^2(1)=.018$ p=.893    | Exclude                |
| Fixed intercept, Random intercept (participant), Complexity, CDS, Omission error, Commission error, CDS * Commission error                                                                                                                                        | Omission error * Commission error | 2970.154          | 10                   | $\chi^2(1)=.307$ p=.580    | Exclude                |
| Fixed intercept, Random intercept (participant), Complexity, CDS, Omission error, Commission error                                                                                                                                                                | CDS * Commission error            | 2976.517          | 8                    | $\chi^2(2)=6.363$ p=.042   | Include                |
| Fixed intercept, Random intercept (participant), Complexity, CDS, Omission error                                                                                                                                                                                  | Commission error                  | 2978.200          | 7                    | $\chi^2(1)=1.683$ p=.195   | Exclude                |
| Fixed intercept, Random intercept (participant), Complexity, CDS                                                                                                                                                                                                  | Omission error                    | 2983.210          | 6                    | $\chi^2(1)=5.010$ p=.025   | Include                |
| Fixed intercept, Random intercept (participant), Complexity                                                                                                                                                                                                       | CDS                               | 3029.940          | 4                    | $\chi^2(2)=46.730$ p<.001  | Include                |
| [Intercepts only model] Fixed intercept, Random intercept (participant)                                                                                                                                                                                           | Complexity                        | 3103.021          | 3                    | $\chi^2(1)=73.081$ p<.001  | Include                |
| Fixed intercept                                                                                                                                                                                                                                                   | Random intercept (participant)    | 3114.720          | 2                    | $\chi^2(1)=11.699$ p=.001  | Include                |
| [Null model]                                                                                                                                                                                                                                                      | Fixed intercept                   | 3567.464          | 1                    | $\chi^2(1)=452.744$ p<.001 | Include                |

### Final model

Intercept for fixed effects, Random intercept: Participant (Covariance structure: Variance components), Task complexity (low, high), Quality of clinical decision support (correct, incorrect, control), Omission error (no, yes), Quality of clinical decision support \* Commission error (no, yes), Residual.

10 parameters, -2 Log likelihood = 2970.154

## Supplementary Appendix B: Multilevel Model Coefficients

|                                        | Coefficient | Std. Error | df      | t      | Sig. | 95% Confidence Interval |             |
|----------------------------------------|-------------|------------|---------|--------|------|-------------------------|-------------|
|                                        |             |            |         |        |      | Lower Bound             | Upper Bound |
| Intercept                              | 29.81       | 5.048      | 356.884 | 5.905  | .000 | 19.88                   | 39.74       |
| Low task complexity                    | 14.17       | 1.380      | 302.436 | 10.266 | .000 | 11.45                   | 16.89       |
| High task complexity                   | .           | .          | .       | .      | .    | .                       | .           |
| Correct CDS                            | -20.42      | 7.071      | 343.683 | -2.888 | .004 | -34.33                  | -6.51       |
| Incorrect CDS                          | -15.18      | 5.202      | 340.806 | -2.918 | .004 | -25.41                  | -4.95       |
| Control (No CDS)                       | .           | .          | .       | .      | .    | .                       | .           |
| No omission error                      | 3.69        | 1.742      | 361.914 | 2.121  | .035 | .27                     | 7.12        |
| Omission error                         | .           | .          | .       | .      | .    | .                       | .           |
| Correct CDS * No commission error      | -.16        | 5.346      | 339.548 | -.029  | .977 | -10.67                  | 10.36       |
| Correct CDS * Commission error         | .           | .          | .       | .      | .    | .                       | .           |
| Incorrect CDS * No commission error    | 6.00        | 2.520      | 353.936 | 2.381  | .018 | 1.04                    | 10.96       |
| Incorrect CDS * Commission error       | .           | .          | .       | .      | .    | .                       | .           |
| Control (No CDS) * No commission error | -7.87       | 5.047      | 345.557 | -1.560 | .120 | -17.80                  | 2.05        |
| Control (No CDS) * Commission error    | .           | .          | .       | .      | .    | .                       | .           |

. = parameter is redundant.
